# Supplementary material
Source: publisher site journal article supplement (https://www.dovepress.com/article/468748)
Supplement: Supplementary file 1 [file get_supplementary_file.php]

**Supplementary materials**

**Supplementary Table 1 The indicators of logistic regression model**

| **Variables** | **OR** | **CI Lower** | **CI Upper** | **Estimate** | **Std. Error** | ***z* value** | ***p*-value** |
| --- | --- | --- | --- | --- | --- | --- | --- |
| Intercept | 5.92E+23 | 10.01 | 1.03E+272 | 54.737 | 286.022 | 0.191 | 0.848 |
| Gender | 1.42 | 0.64 | 3.25 | 0.352 | 0.413 | 0.852 | 0.394 |
| Age | 1.00 | 0.92 | 1.09 | 0.002 | 0.040 | 0.042 | 0.967 |
| Age at Onset | 0.97 | 0.90 | 1.04 | -0.033 | 0.035 | -0.941 | 0.347 |
| BMI | 1.02 | 0.93 | 1.12 | 0.021 | 0.046 | 0.444 | 0.657 |
| Education years | 1.09 | 0.95 | 1.26 | 0.086 | 0.073 | 1.178 | 0.239 |
| Hypnagogic/hypnopompic Hallucination | 2.21 | 1.01 | 4.90 | 0.791 | 0.401 | 1.974 | **0.048** |
| Sleep paralysis | 1.15 | 0.48 | 2.78 | 0.143 | 0.445 | 0.321 | 0.748 |
| Total sleep time | 1.00 | 0.99 | 1.00 | -0.004 | 0.004 | -0.989 | 0.323 |
| Wake after sleep onset | 1.00 | 0.98 | 1.01 | -0.005 | 0.009 | -0.585 | 0.559 |
| Sleep efficiency | 0.97 | 0.87 | 1.07 | -0.032 | 0.051 | -0.630 | 0.529 |
| Sleep latency | 1.02 | 0.96 | 1.09 | 0.021 | 0.031 | 0.686 | 0.493 |
| R stage | 0.60 | 0.00 | 1.05 | -0.514 | 2.864 | -0.180 | 0.857 |
| N1 stage | 0.58 | 0.00 | 1.03 | -0.541 | 2.860 | -0.189 | 0.850 |
| N2 stage | 0.59 | 0.00 | 1.03 | -0.535 | 2.861 | -0.187 | 0.852 |
| N3 stage | 0.57 | 0.00 | 1.01 | -0.554 | 2.857 | -0.194 | 0.846 |
| AHI | 1.00 | 0.92 | 1.07 | -0.002 | 0.037 | -0.057 | 0.955 |
| Respiratory-related arousals index | 1.02 | 0.91 | 1.16 | 0.016 | 0.060 | 0.273 | 0.785 |
| Leg movement-related arousals index | 1.00 | 0.78 | 1.28 | -0.004 | 0.125 | -0.031 | 0.975 |
| Spontaneous arousals index | 0.95 | 0.88 | 1.01 | -0.051 | 0.035 | -1.445 | 0.148 |
| PLMI | 0.98 | 0.94 | 1.01 | -0.018 | 0.018 | -1.015 | 0.310 |
| Sleep latency-MSLT (min) | 1.05 | 0.82 | 1.34 | 0.045 | 0.125 | 0.361 | 0.718 |
| ESS | 1.01 | 0.92 | 1.11 | 0.010 | 0.048 | 0.215 | 0.830 |
| BIS | 0.99 | 0.95 | 1.02 | -0.015 | 0.017 | -0.850 | 0.396 |
| Attentional impulsivity score | 1.06 | 0.98 | 1.16 | 0.061 | 0.044 | 1.390 | 0.165 |
| Motor impulsivity score | 1.10 | 1.02 | 1.18 | 0.091 | 0.037 | 2.440 | **0.015** |
| Non-planning impulsivity score | 0.98 | 0.95 | 1.01 | -0.017 | 0.014 | -1.227 | 0.220 |

Abbreviations: OR, odds ratio; CI, confidence interval; BMI, body mass index; AHI, apnea hypopnea index; MSLT, multiple sleep latency test; BIS, Barratt Impulse Scale; PLMI, periodic leg movements index; MSLT, multiple sleep latency test; ESS, Epworth Sleepiness Scale.

*P*-value in bold was statistically significant (*P* < 0.05).
